# Supplementary material for: Sex differences in the evolution of left ventricle remodeling in rats with severe volume overload
Source: BMC Cardiovasc Disord. 2020 Feb 3;20:51. doi: 10.1186/s12872-020-01360-0 (PMC6998357; doi:10.1186/s12872-020-01360-0)
Supplement: Supplementary file 1 — Additional file 1. Raw data of the study. [file 12872_2020_1360_MOESM1_ESM.xlsx]

## Sheet: Table 1
Identification	Sex	Surgery	BW (g)	Tibia (mm)	Heart (mg)	LA (mg)	LV (mg)	RV (mg)	Lungs (g)
100	Male	SHAM	846.4	60.4	1552	50	1164.2	252.8	2244	25.6954	1.83365					1.37547	19.2748
101	Male	SHAM	697.7	61.19	1597.8	48.8	1163.2	278.1	2995.5	26.1121	2.2901					1.66719	19.0096
103	Male	SHAM	781.4	60.47	1646.6	29.9	1212.9	332.9	2431.9	27.23	2.10724					1.55221	20.0579
104	Male	SHAM	840.8	60.38	1560	30.6	1165	315.4	3128.3	25.8364	1.85538					1.38559	19.2945
105	Male	SHAM	747.4	60.42	1535.5	28.8	1177.5	344.8	2123	25.4138	2.05446					1.57546	19.4886
134	Male	SHAM	863.5	62.8	1796.9	37.8	1367.3	299.9	3367	28.6131	2.08095					1.58344	21.7723
135	Male	SHAM	896.4	60.39	1840.2	53.5	1418.2	292.5	2306.4	30.4719	2.05288					1.58211	23.484
136	Male	SHAM	705.2	60.82	1483.8	30.5	1140.8	256.9	2125.9	24.3966	2.10408	26.7212	2.04734	0.714216	0.719898	1.6177	18.757	1.5424	20.1423	0.743333	0.731072
106	Female	SHAM	551.2	52.53	1053.2	22.7	777	202.8	2569.6	20.0495	1.91074					1.40965	14.7915
107	Female	SHAM	398.8	53.14	999.9	20	728.4	202.1	2044.6	18.8163	2.50727					1.82648	13.7072
108	Female	SHAM	500	52.65	1043.4	24.6	792.9	193.4	1747	19.8177	2.0868					1.5858	15.0598
109	Female	SHAM	450.7	53.07	1089.8	21.5	823.5	196.7	1658.9	20.5351	2.41802					1.82716	15.5172
110	Female	SHAM	470.1	52.83	1086.5	18.6	798.1	214.6	2112.7	20.566	2.31121					1.69772	15.1069
111	Female	SHAM	471.5	53.84	965.6	20	728	161.4	1781.6	17.9346	2.04793					1.54401	13.5215
132	Female	SHAM	406.8	52.72	1025.4	20.8	817.3	174.1	1884.5	19.4499	2.52065					2.0091	15.5027
133	Female	SHAM	597.4	53.19	1207.9	29.4	905.8	226.9	2155	22.7092	2.02193	19.9848	2.22807	0.711842	0.864571	1.51624	17.0295	1.67702	15.0296	0.926059	0.767953
112	Male	AR	821.8	60.42	3251	135.4	2497.1	458.5	2986.8	53.8067	3.95595					3.03857	41.329
113	Male	AR	785	60.08	2295.6	71.6	1741.6	347.2	3092.8	38.2091	2.92433					2.2186	28.988
114	Male	AR	822.7	60.12	2808.4	114.1	2136.2	362.8	3657.6	46.7132	3.41364					2.59657	35.5323
116	Male	AR	908.4	62.81	2880.8	85.6	2133.3	499.9	2798.7	45.8653	3.17129					2.34841	33.9643
117	Male	AR	771.8	60.7	2909	128	2247.9	383.5	3093.3	47.9242	3.76911					2.91254	37.0329
122	Male	AR	696.8	59.56	2651.1	79.6	2033	432	2722.3	44.5114	3.80468					2.91762	34.1336
124	Male	AR	720.2	60.12	2773.8	121.6	2129.6	389.8	2410.9	46.1377	3.85143					2.95696	35.4225
125	Male	AR	791	60.95	2839.3	95	2162.3	447	2609.5	46.5841	3.58951					2.73363	35.4766
137	Male	AR	950.2	61.71	3480.3	199.2	2387.7	485	4358.2	56.3977	3.6627					2.51284	38.6923
138	Male	AR	720.6	60.09	2424.5	86.5	1932.8	364.6	2709.2	40.3478	3.36456					2.68221	32.1651
139	Male	AR	691	59.66	2229.3	60	1838.1	286.8	2405.2	37.3667	3.22619	45.8058	3.52122			2.66006	30.8096	2.68891	34.8678
118	Female	AR	438.2	52.98	1761.5	53.7	1392.5	235.2	1790.1	33.2484	4.01985					3.17777	26.2835
119	Female	AR	363.7	50.74	1541.1	52.2	1211.4	176.6	1778.1	30.3725	4.23728					3.33077	23.8747
120	Female	AR	508	53.21	1850.2	47	1477.5	235.8	2250.6	34.7717	3.64213					2.90846	27.7673
127	Female	AR	536	53.2	2274	141	1547.2	371.4	2809.2	42.7444	4.24254					2.88657	29.0827
131	Female	AR	391.1	51.17	1683.3	47.9	1289.3	291.9	1935	32.8962	4.30401					3.2966	25.1964
142	Female	AR	386.6	52.17	1714.6	35.9	1399.6	242.2	1849.3	32.8656	4.43508					3.62028	26.8277
144	Female	AR	446.2	53.98	1977.9	59.8	1602.5	219.1	1900	36.6413	4.43277					3.59144	29.6869
145	Female	AR	354	52.05	1567.5	35.4	1168.3	258.4	1824.5	30.1153	4.42797					3.30028	22.4457
146	Female	AR	506.5	53.86	1823.7	51.2	1442.2	270.6	2055.2	33.86	3.60059					2.84738	26.7768
147	Female	AR	544.9	52.41	1450.8	42.8	1182.3	204.9	2312	27.6817	2.66251					2.16976	22.5587
148	Female	AR	381.2	52.78	2170.4	54.4	1677.7	370.7	2118.7	41.1216	5.6936	34.2108	4.15439			4.4011	31.7867	3.23004	26.5716

## Sheet: Table 2
Identification	Sex	Surgery	IVSd (cm) SWT Septum Wall Thickness	LVIDd (cm) EDD End-diastolic Diameter	LVPWd (cm) PW Posterior Wall	IVSs (cm) ESD End-systolic Diameter	RWT (unitless) Relative Wall Thickness	Ejection fraction (%)	MV E point (mm/s) E Wave	MC A point (mm/s) A Wave	Ao dec slope (mm/s2) Slope
100	Male	SHAM	1.6425	9.23906	1.68813	5.2925	0.360494	0.386243	901.108	559.572	-42165.3	846.4	10.9157	6.25295	60.4	152.965	87.6242
101	Male	SHAM	1.5535	8.8973	1.88303	5.36663	0.304357	68.0794	937.39	607.479	-42443.9	697.7	12.7523	7.69188	61.19	145.404	87.7043
103	Male	SHAM	1.55829	8.37027	1.86995	3.80669	0.295425	83.6773	926.181	472.408	-59210.6	781.4	10.7119	4.87163	60.47	138.42	62.9518
104	Male	SHAM	1.5889	9.47046	2.03725	5.54541	0.303254	70.0057	904.982	506.773	-56292.7	840.8	11.2636	6.5954	60.38	156.848	91.8419
105	Male	SHAM	1.577	9.937	1.672	6.384	0.276537	62.7583	749.348	385.095	-29158.5	747.4	13.2954	8.54161	60.42	164.465	105.66
134	Male	SHAM	1.50574	9.78197	2.03451	5.60804	0.279584	71.3354	885.036	390.362	-29676.6	863.5	11.3283	6.49455	62.8	155.764	89.3001
135	Male	SHAM	1.6225	10.0148	2.08385	5.64519	0.295838	72.3614	964.306	564.361	-48429	896.4	11.1722	6.29762	60.39	165.835	93.4788
136	Male	SHAM	1.42999	9.3008	1.72408	5.42026	0.258287	70.3862	832.105	417.979	-34858.5	705.2	13.1889	7.68613	60.82	152.923	89.1197	154.078	88.4601	0.352242	0.548845	11.8285	6.80397	0.365165	0.562302
													#DIV/0!	#DIV/0!		#DIV/0!	#DIV/0!
106	Female	SHAM	1.30833	7.67387	1.59348	4.3024	0.38	78.4654	936.031	473.522	-50257.5	551.2	13.9221	7.80552	52.53	146.085	81.9037
107	Female	SHAM	1.17712	7.7745	1.46	4.18837	0.34	77.1287	720.765	373.493	-42654.6	398.8	19.4947	10.5024	53.14	146.302	78.8177
108	Female	SHAM	1.35625	8.08906	1.55	4.11719	0.36	80.9251	784.523	353.902	-40912.9	500	16.1781	8.23437	52.65	153.638	78.1992
109	Female	SHAM	1.28767	7.42555	1.50228	3.79147	0.38	79.4025	811.842	370.416	-40437.9	450.7	16.4756	8.41239	53.07	139.92	71.4427
110	Female	SHAM	1.18394	8.15319	1.49112	4.85095	0.33	75.9151	781.625	381.101	-35687.8	470.1	17.3435	10.319	52.83	154.329	91.822
111	Female	SHAM	1.17781	7.66284	1.66028	4.32808	0.37	83.0779	789.659	389.135	-42635.7	471.5	16.252	9.17939	53.84	142.326	80.3879
132	Female	SHAM	1.1465	7.81334	1.75627	3.85054	0.37	81.2083	933.512	422.633	-37787.1	406.8	19.2068	9.46543	52.72	148.205	73.0375
133	Female	SHAM	1.19756	8.27204	1.90723	4.59065	0.38	73.7501	681.933	353.179	-25940.8	597.4	13.8467	7.68438	53.19	155.519	86.3066	148.291	80.2397	0.434965	0.779863	16.59	8.95036	0.583942	0.969168
													#DIV/0!	#DIV/0!		#DIV/0!	#DIV/0!
112	Male	AR	1.66859	12.7722	2.72507	7.97396	0.344002	54.531	848.03	393.488	-29581.1	821.8	15.5417	9.70304	60.42	211.39	131.976
113	Male	AR	1.46808	11.602	2.20766	6.44641	0.317	69.2732	858.383	486.104	-38050.6	785	14.7796	8.21199	60.08	193.109	107.297
114	Male	AR	1.71888	12.3843	2.22505	7.80376	0.318	51.5078	934.931	424.437	-50540.5	822.7	15.0532	9.48555	60.12	205.993	129.803
116	Male	AR	1.62276	12.5585	2.54638	8.30269	0.332	62.2901	1098.83	543.542	-58891	908.4	13.8249	9.1399	62.81	199.945	132.187
117	Male	AR	1.69935	13.0739	2.2669	9.37146	0.303	37.5011	748.7	368.241	-34759	771.8	16.9395	12.1423	60.7	215.385	154.39
122	Male	AR	1.77609	12.9145	2.13266	9.16047	0.3	50.589	731.588	354.547	-36498.3	696.8	18.5341	13.1465	59.56	216.832	153.802
124	Male	AR	1.55089	11.6492	2.15732	6.96893	0.32	72.1775	770.99	363.52	-31520.6	720.2	16.1749	9.67638	60.12	193.766	115.917
125	Male	AR	1.54992	14.8875	2.37269	11.3673	0.26	52.2004	1007.2	334.45	-49410.8	791	18.8211	14.3708	60.95	244.257	186.502
137	Male	AR	1.76838	12.1497	2.26018	7.75371	0.33	57.4647	1013.65	500.002	-53609.9	950.2	12.7864	8.16009	61.71	196.883	125.648
138	Male	AR	1.50857	12.1864	2.49857	7.84143	0.33	56.9587	752.797	348.537	-41423.4	720.6	16.9115	10.8818	60.09	202.803	130.495
139	Male	AR	1.63315	12.6178	2.33925	8.29901	0.32	56.4494	876.51	411.687	-42428.5	691	18.2602	12.0101	59.66	211.495	139.105	208.351	137.011			16.1479	10.6299
													#DIV/0!	#DIV/0!		#DIV/0!	#DIV/0!
118	Female	AR	1.52167	10.9456	1.97125	7.57375	0.32	55.6706	570.432	246.309	-39170.9	438.2	24.9786	17.2838	52.98	206.599	142.955
119	Female	AR	1.39866	9.90915	2.06243	6.614	0.35	59.3936	737.995	349.046	-51412.5	363.7	27.2454	18.1853	50.74	195.293	130.351
120	Female	AR	1.58563	9.92542	2.37604	5.93396	0.4	68.3963	775.793	422.962	-33008.8	536	18.5176	11.0708	53.21	186.533	111.52
127	Female	AR	1.48219	12.5841	2.10703	9.0675	0.29	51.1166	826.841	437.893	-40773.6	391.1	32.1761	23.1846	51.17	245.927	177.203
142	Female	AR	1.47583	11.2292	2.079	7.10417	0.32	63.6878	714.837	279.585	-31903.1	386.6	29.046	18.376	52.17	215.242	136.173
144	Female	AR	1.58735	11.5549	2.33862	7.44983	0.34	62.0305	1050.68	541.219	-51191.9	446.2	25.8963	16.6962	53.98	214.06	138.011
145	Female	AR	1.39313	11.1781	1.89188	7.4472	0.29	59.2245	837.764	407.143	-54190.5	354	31.5766	21.0373	52.05	214.757	143.078
146	Female	AR	1.60054	10.1796	1.9272	6.5655	0.35	62.3551	763.104	343.287	-46093.1	506.5	20.0979	12.9625	53.86	189.001	121.899
147	Female	AR	1.67267	13.0415	2.05871	9.69433	0.29	47.5578	1011.38	491.054	-76368	544.9	23.9337	17.791	52.41	248.835	184.971
148	Female	AR	1.52418	11.1719	2.09024	7.49447	0.33	58.8259	809.87	390.944	-47123.6	381.2	29.3073	19.6602	52.78	211.67	141.995
																		212.792	142.816			26.2775	17.6248

## Sheet: Table 3
Identification	Sex	IVSd (cm) SWT Septum Wall Thickness	LVIDd (cm) EDD End-diastolic Diameter	LVPWd (cm) PW Posterior Wall	IVSs (cm) ESD End-systolic Diameter	RWT (unitless) Relative Wall Thickness	Ejection fraction (%)	MV E point (mm/s) E Wave	MC A point (mm/s) A Wave	Ao dec slope (mm/s2) Slope
100	Male	0.609762	8.1402	1.16692	4.24642	0.218261	77.4874	1045.43	765.498	-51319.3
101	Male	0.64096	8.10505	1.37496	4.31097	0.248724	76.4456	1078.82	651.282	-43418.3
103	Male	0.943322	8.22459	1.20863	4.525	0.261649	74.4492	499.739	266.676	-26139.3
104	Male	0.75625	8.01625	1.21	4.5925	0.245283	71.99	1043.62	571.286	-49602.3
105	Male	0.770089	7.83482	1.06585	4.92746	0.23433	65.2538	731.606	490.167	-29042.4
134	Male	0.638854	8.08401	1.13411	4.99396	0.219318	66.5724	1020.77	599.414	-51066.5
135	Male	1.18373	8.22486	1.38782	5.20432	0.312655	64.6028	944.914	421.687	-34779.4
136	Male	0.672586	7.62264	1.34517	4.49792	0.264706	70.1474	841.878	623.79	-32500.9
112	Male	0.854523	7.89661	0.864818	3.60341	0.217731	83.7027	827.424	568.125	-40363.2
113	Male	0.802455	7.98046	1.03173	4.62955	0.229834	71.1716	708.149	444.22	-29264.9
114	Male	0.646875	8.60344	0.884062	4.84438	0.177945	72.8841	889.659	749.207	-30420.8
116	Male	0.703125	8.02969	0.829687	4.68281	0.190893	70.7928	822.155	496.179	-34579.8
117	Male	0.717187	8.12813	1.06875	4.37344	0.219723	75.7875	913.175	591.367	-31834.9
122	Male	0.606469	8.71198	0.856758	4.57259	0.167956	76.9573	1019.61	644.556	-31623.6
124	Male	0.56226	7.3231	0.918815	4.07296	0.202247	74.1567	822.07	423.862	-46212.6
125	Male	0.752969	7.18656	1.02937	3.00234	0.248011	87.0611	558.142	382.189	-19120.6
137	Male	0.632837	8.58669	1.37269	5.0144	0.233562	70.49
138	Male	1.07976	7.88031	1.45257	4.2768	0.321348	75.387	1043.02	466.62	-51135.2
139	Male	0.905131	8.08531	1.32254	3.95527	0.27552	80.6854	809.337	455.117	-38993.9
102	Male	0.883932	7.38927	1.25141	3.56552	0.288978	81.564	861.413	473.623	-39441.7
115	Male	0.948279	7.24507	1.31939	3.78413	0.312995	77.7773	672.279	318.83	-39882.7
140	Male	0.8225	7.245	1.1375	4.2175	0.270531	71.2486	689.507	427.562	-32209.6
106	Female	0.628378	7.59766	1.14251	4.32724	0.233083	72.5429	909.847	572.434	-44726.4
107	Female	0.6325	7.21875	1.3475	3.91875	0.274286	75.6475	1042.28	627.09	-45537.1
108	Female	0.67942	7.75339	1.01913	4.27635	0.219072	74.4837	641.234	442.13	-36034.1
109	Female	0.78375	7.54875	1.34062	3.17625	0.281421	86.7094	954.249	689.197	-35987.5
110	Female	0.662172	6.87334	1.01974	3.69492	0.244701	76.3637	705.815	412.292	-32119
111	Female	0.614617	7.4542	1.0874	3.85318	0.22833	78.2342	835.809	543.515	-31754.6
132	Female	0.812558	6.69826	1.03708	3.26627	0.276137	81.3821	950.381	639.222	-35024.2
133	Female	0.597885	7.18368	1.00553	4.26673	0.223203	69.8795	980.147	557.629	-56870.8
118	Female	0.576611	7.04327	0.840666	4.20872	0.201224	69.5118	844.053	494.463	-33674.5
119	Female	0.804831	6.51115	1.10936	3.30633	0.293987	79.5524
120	Female	0.729443	7.14607	0.989075	3.37522	0.240485	82.5835	735.125	404.056	-37081.4
127	Female	0.546458	6.73542	0.813333	3.83792	0.201887	72.9054	681.477	382.823	-27424.2
142	Female	0.59594	6.89394	1.19188	3.56209	0.259332	78.4962	833.64	561.379	-33479.8
144	Female	0.658404	6.87064	0.906274	3.16034	0.227734	83.7738	1092.51	584.331	-48437
145	Female	0.690625	6.38563	1.00937	3.02813	0.266223	82.7403	901.274	543.886	-42061.7
146	Female	0.733125	7.10813	1.05187	3.80375	0.251121	76.5139	1071.32	576.803	-53754.9
147	Female	0.82176	6.51929	1.10481	3.11356	0.295518	82.3775	734.107	460.918	-36981.8
148	Female	0.882	6.538	1.092	3.528	0.301927	76.309	767.796	323.284	-46262.2
126	Female	0.84151	6.17107	1.26226	2.98035	0.340909	82.055	951.686	513.656	-60672.3
128	Female	0.86625	6.3875	0.9975	3.43	0.291781	76.6608	653.063	372.157	-27053.6
131	Female	1.00964	7.09766	1.10505	3.58072	0.297942	79.6095	773.017	470.193	-38435.9
143	Female	0.851667	7.77	1.225	4.27	0.267267	74.6945	726.714	336.222	-46121.9

## Sheet: Figure 1
Figure 1A Males
Months	Sham SAX										Sham PSLAX										AR SAX										AR PSLAX
0.5	8.51	8.1		8.17	8.8	8.01	8.04	8.53	8.03		8.25	8.17		8.21	8.63	8.73	8.46	8.47	7.34		10.36	8.82	9.29	9.43	8.59	9.05	9.05	9.07	7.95	9.5	9.62	8.99	9.33	9.75	9.07	9.93	10.14	10.48	8.94	9.35
2	8.97	8.28		7.99	8.16	8.06	9.03	9.42	8.44		8.33	8.37		8.44	8.57	9.06	8.86	9.72	8.12		11.84	9.5	10.82	12.43	10.78	10.8	11.15	12.47	10.67	10.41	11.53	9.82	10.59	12.45	10.89	10.89	11.12	12.63	10.27	10.49
4	8.59	8.9		8.39	8.77	9.53	9.47	9.83	8.96		8.4	8.73		8.09	9.1	9.19	9.44	9.93	8.55		13.92	9.48	11.2	11.35	12.06	12.07	11.83	13.7	11.11	11.73	12.87	9.59	12.15	11.6	11.45	11.83	11.74	14.15	11.27	11.51
6	8.88	8.87		8.58	9.4	9.68	9.88	9.79	9		9.24	8.9		8.37	9.47	9.94	9.78	10.01	9.3		12.5	10.44	12.38	12.53	12.33	12.55	11.9	14.74	12.32	12.08	12.77	11.6	12.38	12.56	13.07	12.91	11.65	14.9	12.1	12.2
Figure 1B Females
Months	Sham SAX															Sham PSLAX															Sham PSLAX															AR SAX
0.5	7.68	7.06	7.23	7.68	7.47	7.69	6.73	6.85								7.7	7.36	7.15	8.03	7.79	7.66	6.8	7.29								8.82	8.29	9.3	9.93	7.73	8.58	9.09	7.63	7.52							9.21	8.7	9.22	9.9
2	7.75	7.33	7.65	7.16	7.56	6.81	7.19	7.41								7.51	6.46	6.84	6.96	7.83	6.69	7.14	7.83								9.46	9.21	8.88	10.78	10.16	10.13	9.85	8.73	11.41							9.59	8.83	9.09	11.17
4	7.35	7.48		7.62	7.51	7.46	7.2	7.78								7.23	7.01	7.35	7.48	6.65	7.1	7.39	7.4								10.67	10.27	10.31	12.13	9.7	11.23	10.27	9.78	12.14							10.94	9.71	10.22	12.02
6	7.93	7.9	7.7	8.03	7.76	7.65	7.98	8.05								7.67	7.77	8.09	7.43	8.15	7.66	7.81	8.27								11.18	9.81	10.03	12.55	11.26	12.29	10.92	10.17	13.11							10.95	9.91	9.93	12.58
Figure 1C
Months	Males		Females
0.5	10.1194	1.06324	17.052	2.56082
2	29.7674	4.32205	33.8166	4.43258
4	30.8117	5.03058	43.2358	4.77797
6	33.6609	4.61206	42.9559	5.32349
Figure 1D Males
Months	Sham SAX										Sham PSLAX										AR SAX										AR PSLAX
0.5	3.46	3.99	4.28	4.81	4.57	4.38	4.36	4.47			4.04	4.72	4.56	4.88	5.37	4.21	4.68	4.02			5.54	4.42	4.84	5.31	4.44	5.28	4.59	4.94	3.68	5.1	5.23	4.2	5.33	5.84	4.91	5.84	5.25	6.15	4.55	5.43
2	4.42	3.61	3.58	4.5	4.54	4.6	4.87	4.69			4.41	4.26	4.12	4.57	5.17	4.87	5.73	4.57			6.81	4.65	6.1	7.71	6.8	7.48	6.48	8.23	6.6	6.35	6.68	4.96	6.3	7.69	6.88	6.97	6.03	8.25	6.28	6.42
4	4	4.82	4.1	4.54	5.53	5.08	5.6	5.16			3.72	4.84	4.36	5.01	5.77	5.18	5.87	5.07			9.38	5.92	7.59	7.96	8.64	8.32	6.97	10.09	6.52	7.36	8.35	6.08	8.31	8.29	8.19	7.96	7.21	9.8	6.69	7.47
6	4.91	5.11	4.66	5.27	6.59	5.79	5.67	5.07			5.29	5.37	3.81	5.55	6.38	5.61	5.65	5.42			8.16	5.69	7.8	8.58	8.58	8.58	7.14	11.53	7.49	8.15	7.97	6.45	7.8	8.3	9.37	9.16	6.97	11.4	7.75	7.84
Figure 1E Females
Months	Sham SAX										Sham PSLAX										AR SAX										AR PSLAX
0.5	3.57	2.88	2.59	2.76	3.73	3.52	3.39	3.16			3.35	3.55	2.71	4.23	4.16	4.06	3.22	3.59			4.69	4.71	5.1	5.38	4.65	4.97	4.05	4.35	5.71		5.61	5.02	5.08	5.66	4.44	4.46	4.15	4.33	4.96
2	3.53	4.46	3.88	3.09	4.06	3.03	2.94	3.25			3.4	2.8	3.47	3.24	3.95	3.2	3.42	3.99			5.72	5.75	4.81	6.87	6.5	6.36	6.05	5.36	7.79		6.01	5.17	4.98	7.39	6.64	6.46	6.54	5.57	7.77
4	4.06	3.76		3.35	4.12	3.05	3.53	3.86			4	3.3	4.41	3.44	3.64	3.08	3.72	3.78			7.3	7.25	6.22	8.39	5.65	7.01	6.59	6.01	8.24		7.66	7.57	6.54	8.66	6.02	6.95	6.73	6.28	8.35
6	4.07	4.16	3.76	4.04	4.18	3.55	3.86	4.49			4.3	4.19	4.12	3.79	4.85	4.33	3.85	4.59			7.73	6.85	5.89	9.12	7.2	8.46	6.95	6.48	9.19		7.57	6.61	5.93	9.07	7.1	7.45	7.45	6.57	9.69
Figure 1F
Months	Males		Females
0.5	12.2145	0.853187	51.4236	4.17823
2	54.4614	4.67384	73.7803	7.59853
4	62.2457	5.94338	89.4114	7.62851
6	51.753	5.04231	87.8819	6.76529
Figure 1G
Months	Sham SAX										Sham PSLAX										AR SAX										AR PSLAX
0.5	0.62	0.63	0.71	1.37	1.29	1.01	1.23	1.1			0.73	0.68	0.61	1.27	1.29	1.12	1.25	1.08			0.89	0.85	0.79	0.7	0.74	1.46	1.64	1.32	1.39	1.2	0.73	0.74	0.82	0.76	0.87	1.36	1.49	1.21	1.2	1.28
2	1.37	0.75	0.84	1.01	1.02	1.67	1.4	1.49			1.52	0.77	1.04	0.98	0.97	1.5	1.56	1.49			1.57	1.29	1.43	1.07	1.33	1.45	1.65	1.81	1.72	1.62	1.39	1.29	1.36	1.16	1.32	1.39	1.37	1.74	1.72	1.56
4	1.4	1.51	1.3	1.3	1.28	1.76	1.75	1.5			1.28	1.49	1.31	1.25	1.44	1.69	1.67	1.65			1.26	1.54	1.76	1.6	1.87	1.95	2.04	1.67	1.61	1.61	1.51	1.45	1.66	1.75	1.78	1.84	1.98	1.72	1.59	1.51
6	1.51	1.57	1.62	1.6	1.48	1.38	1.44	1.45			1.64	1.55	1.56	1.59	1.58	1.51	1.62	1.43			1.54	1.62	1.72	1.63	1.6	1.78	1.76	1.79	1.6	1.55	1.67	1.47	1.72	1.62	1.7	1.78	1.55	1.55	1.77	1.51
Figure 1H
Months	Sham SAX										Sham PSLAX										AR SAX										AR PSLAX
0.5	1.24	0.64	0.84	0.6	0.78	0.58	0.81	0.94			0.67	0.6	0.66	0.62	0.72	0.57	0.82	0.84			0.67	0.66	0.67	1.03	1.24	1.05	0.98	1.18	1.28		0.67	0.68	0.64	1.01	1.27	1.02	1.02	1.07	1.23
2	0.67	0.84	0.84	0.99	0.89	0.81	1.13	1.43			0.67	0.84	0.84	0.99	0.89	0.81	1.13	1.43			1.38	1.26	1.47	1.31	1.52	1.61	1.47	1.57	1.75		1.26	1.18	1.48	1.7	1.44	1.58	1.43	1.47	1.69
4	1.09	1.06		1.3	1.14	1.11	1.47	1.51			1.13	1.12	1.16	1.24	1.05	1.07	1.38	1.38			1.63	1.38	1.83	1.59	1.55	1.46	1.4	1.47	1.59		1.54	1.33	1.63	1.56	1.39	1.43	1.38	1.45	1.6
6	1.21	1.03	1.3	1.43	1.25	1.21	1.07	1.22			1.31	1.18	1.36	1.29	1.18	1.18	1.15	1.2			1.61	1.36	1.69	1.73	1.44	1.6	1.45	1.65	1.69		1.52	1.4	1.59	1.48	1.48	1.59	1.39	1.6	1.67
Figure 1I
Months	Males		Females
0.5	10.3518	2.14138	21.099	3.81763
2	25.1518	3.66941	56.0234	6.84862
4	14.6441	1.29764	24.552	2.13837
6	10.1411	0.384637	30.0412	1.92763
Figure 1J
Months	Sham SAX										Sham PSLAX										AR SAX										AR PSLAX
0.5	0.21	0.25	0.23	0.32	0.32	0.29	0.3	0.3			0.23	0.2	0.21	0.35	0.32	0.29	0.3	0.31			0.21	0.23	0.19	0.19	0.22	0.35	0.36	0.33	0.32	0.28	0.19	0.21	0.19	0.19	0.22	0.31	0.33	0.28	0.28	0.27
2	0.34	0.21	0.28	0.29	0.29	0.38	0.37	0.34			0.41	0.22	0.26	0.27	0.28	0.41	0.33	0.4			0.31	0.31	0.3	0.22	0.28	0.28	0.3	0.33	0.37	0.37	0.27	0.31	0.3	0.22	0.28	0.27	0.27	0.32	0.36	0.37
4	0.38	0.35	0.34	0.32	0.3	0.4	0.37	0.36			0.36	0.37	0.35	0.3	0.33	0.41	0.36	0.4			0.26	0.39	0.35	0.33	0.35	0.35	0.35	0.3	0.33	0.34	0.29	0.35	0.32	0.34	0.35	0.32	0.34	0.29	0.35	0.35
6	0.38	0.4	0.42	0.35	0.34	0.33	0.34	0.35			0.36	0.39	0.41	0.38	0.33	0.36	0.37	0.34			0.33	0.37	0.32	0.32	0.32	0.33	0.34	0.27	0.32	0.33	0.34	0.32	0.32	0.33	0.3	0.3	0.32	0.26	0.33	0.33
Figure 1K
Months	Sham SAX										Sham PSLAX										AR SAX										AR PSLAX
0.5	0.35	0.2	0.28	0.2	0.23	0.21	0.28	0.3			0.24	0.21	0.24	0.18	0.23	0.23	0.28	0.27			0.2	0.22	0.19	0.23	0.31	0.26	0.31	0.32	0.28		0.19	0.2	0.19	0.25	0.36	0.29	0.28	0.31	0.28
2	0.23	0.28	0.26	0.3	0.28	0.28	0.34	0.4			0.23	0.3	0.28	0.26	0.26	0.3	0.35	0.37			0.33	0.31	0.36	0.29	0.34	0.36	0.33	0.37	0.32		0.28	0.32	0.38	0.35	0.34	0.34	0.33	0.34	0.32
4	0.33	0.35		0.37	0.34	0.34	0.43	0.44			0.35	0.38	0.35	0.35	0.35	0.35	0.42	0.43			0.34	0.32	0.38	0.3	0.4	0.31	0.31	0.34	0.29		0.31	0.33	0.35	0.28	0.36	0.33	0.32	0.32	0.3
6	0.37	0.31	0.36	0.4	0.35	0.35	0.34	0.39			0.38	0.34	0.36	0.38	0.33	0.37	0.37	0.38			0.32	0.34	0.41	0.31	0.33	0.31	0.32	0.36	0.29		0.32	0.35	0.4	0.29	0.32	0.34	0.29	0.35	0.29
Figure 1L
Months	Males		Females
0.5	-3.42342	0.456	0.596206	0.0835471
2	-1.76	0.191695	12.8926	1.1401
4	-4.96454	0.324065	-10.5556	0.877976
6	-10.6529	0.591444	-7.3945	0.469448
[truncated: 5 more columns]

## Sheet: Figure 2
Figure 2A
Months	Sham										AR
0.5	409.05	365.49	469.61	403.86	430.18	437.65	440.3	500.53			685.74	440.99	607.21	598.21	447.96	724.59	675.45	591.64	592.21	680.3
2	350.79	378.88	333.3	282.89	513.14	535.19	536.97	384.52			1200.76	650.83	821.02	897.4	918.39	917.1	885.73	1184.32	681.03	824.24
4	534.52	620.55	524.97	496.68	552.04	563.2	628.8	583.64			1286.04	789.61	1026.64	913.24	984.98	1096.13	984.78		971.93	1181.11
6	579.4	611.34	523.53	707.18	694.73	755.03	905.56	764.61			1328.62	1003.06	1317.62	1325.46	1294.22	1331.32	1042.89	1950.12	1343.66	1103.77
Figure 2B
Months	Sham										AR
0.5	341.35	234.51	352.32	358.54	353.42	311.98	285.71	279.95			446.8	475.06	528	598.77	544.12	523.46	429.18	394.4	463.94
2	344.55		370.01	369.96	400.23	336.37	303.15	306.78			509.29	615.16	579.9	900.39	655.29	766.71	570.24	578.44	997.77
4	339.09	315.11	305.75	326.63	301.34	250.49	295.74	378.42			570.54	521.22	682.41	961.9	747.08	1098.07	708.59	737.45	1144.19
6	476.52	368.5	382.15	391.22	369.67	290.43	456.98	355.13			896.14	700.07	787.6	1216.84	1044.27	1281.59	942.73	719.76	1355.82
Figure 2C
Months	Males		Females
0.5	39.8872	3.35783	55.4714	5.21441
2	116.687	17.3412	97.5019	11.6765
4	82.2309	6.28911	153.709	20.6325
6	88.267	11.0736	157.262	21.3648
Figure 2D
Months	Sham										AR
0.5	105.09	67.86	67.66	118.77	184.94	128.81	190.09	205.65			217.3	153.91	253.97	195.35	130.85	259.29	213.94	221.1	212.11	226.3
2	73.94	73.47	49.48	64.51	215.8	207.52	188.17	224.18			534.84	246.94	430.51	488.01	396.76	476.01	325.29	661.23	332.23	397.38
4	145.23	214.69	174.63	208.69	263.67	298.4	280.56	265.19			593.45	319.93	586.15	508.11	573.97	591.1	315.85		510.55	573.53
6	236.02	308.86	226.62	343.52	355.15	359.14	384.83	280.96			763.28	462.12	751.93	744.21	905.31	657.82	488.63	1202.18	751.85	610.37
Figure 2E
Months	Sham										AR
0.5	105.09	67.86	67.66	118.77	184.94	128.81	190.09	205.65			217.3	153.91	253.97	195.35	130.85	259.29	213.94	221.1	212.11	226.3
2	73.94	73.47	49.48	64.51	215.8	207.52	188.17	224.18			534.84	246.94	430.51	488.01	396.76	476.01	325.29	661.23	332.23	397.38
4	145.23	214.69	174.63	208.69	263.67	298.4	280.56	265.19			593.45	319.93	586.15	508.11	573.97	591.1	315.85		510.55	573.53
6	236.02	308.86	226.62	343.52	355.15	359.14	384.83	280.96			763.28	462.12	751.93	744.21	905.31	657.82	488.63	1202.18	751.85	610.37
Figure 2F
Months	Males		Females
0.5	55.9868	11.4659	153.824	25.5177
2	212.775	61.2287	342.694	65.5712
4	119.581	18.7223	293.952	64.3851
6	135.268	21.4281	296.369	58.1752
Figure 2G
Months	Sham										AR
0.5	74.31	81.43	85.59	70.59	57.01	70.57	56.83	58.91			68.31	65.1	58.17	67.34	70.79	64.22	68.33	62.63	64.18	66.74
2	78.92	80.61	85.16	77.2	57.94	61.23	64.96	41.7			55.46	62.06	47.56	45.62	56.8	48.1	63.27	44.17	51.22	51.79
4	72.83	65.4	66.74	57.98	52.24	47.02	55.38	54.56			53.85	59.48	42.91	44.36	41.73	46.07	67.93		47.47	51.44
6	59.26	49.48	56.71	51.42	48.88	52.43	57.5	63.25			42.55	53.93	42.93	43.85	30.05	50.59	53.15	38.35	44.04	44.7
Figure 2H
Months	Sham										AR
0.5	80.42	78.02	78.99	74.99	72.31	76.19	81.76	83.28			60.68	53.35	60.25	66.8	80.25	60.35	64.72	63.57	64.81
2	69.89		82.99	78.96	83.5	76.99	81.23	79.6			50.43	48.35	53.53	49.32	61.86	60.89	44.4	65.46	47.31
4	63.63	68.05	62.05	82.6	66.5	84.09	59.32	65.44			38.91	39.66	60.13	52.81	59.99	54.57	48.88	57.22	44.83
6	78.34	49.86	64.3	60.67	60.82	64.06	63.78	74.87			50.32	44.9	57.01	41.37	42.35	48.63	47.71	50.55	38.5
Figure 2I
Months	Males		Females
0.5	-5.50969	0.404899	-18.3789	1.00195
2	-23.1651	2.67828	-32.291	2.2103
4	-14.2947	1.54877	-26.3663	2.67141
6	-19.0504	1.59067	-27.5161	2.43548
Figure 2J
Months	Sham										AR
0.5	303.96	297.62	401.95	285.09	245.24	308.84	250.21	294.88			468.44	287.09	353.24	402.86	317.11	465.3	461.51	370.55	380.11	454.01
2	276.85	305.41	283.83	218.38	297.34	327.68	348.8	160.35			665.92	403.89	390.51	409.39	521.63	441.09	560.44	523.09	348.81	426.86
4	389.29	405.86	350.34	287.99	288.36	264.8	348.24	318.45			692.58	469.68	440.49	405.13	411.01	505.03	668.93		461.38	607.58
6	343.38	302.48	296.9	363.66	339.58	395.89	520.73	483.65			565.33	540.94	565.7	581.25	388.91	673.5	554.26	747.94	591.81	493.4
Figure 2K
Months	Sham										AR
0.5	274.52	182.96	278.31	268.88	255.57	237.71	233.59	233.15			271.12	253.46	318.1	399.98	436.63	315.93	277.75	250.72	300.69
2	240.8		307.07	292.12	334.19	258.97	246.24	244.19			256.84	297.4	310.42	444.06	405.39	466.83	253.2	378.63	472
4	215.77	214.42	189.73	269.8	200.38	210.63	175.42	247.62			221.99	206.73	410.35	507.98	448.14	599.19	346.34	421.95	512.89
6	373.32	183.74	245.73	237.35	224.82	186.04	291.44	265.88			450.92	314.34	449.04	503.37	442.22	623.24	449.8	363.84	522.02
Figure 2L
Months	Males		Females
0.5	32.6824	3.57082	27.784	3.15799
2	69.1714	9.87635	32.816	4.28163
4	56.1747	7.01061	89.536	14.086
6	49.7711	6.43131	82.299	12.4632

## Sheet: Figure 3
Figure 3E					Figure 3F
	LV weight	LVM	LVM(corr)			LV weight	LVM	LVM(corr)
SM	1164.2	1187.03	949.62		SF	777	824.34	659.47
SM	1163.2	1280.94	1024.75		SF	728.4	641.21	512.97
SM	1212.9	1219.3	975.44		SF	792.9	742.41	593.93
SM	1165	1298.96	1039.17		SF	823.5	938.39	750.72
SM	1177.5	1322.7	1058.16		SF	798.1	721.24	576.99
SM	1367.3	1388.44	1110.76		SF	728	697.5	558
SM	1418.2	1365.05	1092.04		SF	817.3	754.2	603.36
SM	1140.8	1132.06	905.65		SF	905.8	913.11	730.49
ARM	2497.1	2748.44	2198.75		ARF	1392.5	1922.75	1538.2
ARM	1741.6	1860.05	1488.04		ARF	1211.4	1384.85	1107.88
ARM	2136.2	2583.95	2067.16		ARF	1477.5	1894.74	1515.79
ARM	2133.3	2657.65	2126.12		ARF	1547.2	2589.68	2071.75
ARM	2247.9	2530.64	2024.51		ARF	1399.6	2035.9	1628.72
ARM	2129.6	2826.28	2261.02		ARF	1602.5	2450.53	1960.42
ARM	2162.3	2462.68	1970.15		ARF	1168.3	1809.54	1447.63
ARM	2387.7	3465.56	2772.45		ARF	1182.3	1653.5	1322.8
ARM	1932.8	2543.58	2034.86		ARF	1677.7	2746.21	2196.97
ARM	1838.1	2504.12	2003.29

## Sheet: Figure 4
Figure 4C
EDD2/EDD1					EDD3/EDD1
Sham	AR	Sham	AR		Sham	AR	Sham	AR
0.94	0.91	0.9	0.93		0.71	0.66	0.73	0.72
0.94	0.95	0.9	0.96		0.73	0.77	0.7	0.83
0.93	0.95	0.92	0.96		0.76	0.79	0.7	0.84
0.91	0.89	0.95	0.96		0.69	0.67	0.76	0.76
0.92	0.92	0.94	0.94		0.71	0.76	0.72	0.76
0.9	0.96	0.95	0.95		0.72	0.77	0.75	0.74
0.95	0.94	0.97	0.96		0.8	0.76	0.67	0.8
0.93	0.96	0.95	0.93		0.72	0.8	0.78	0.74
	0.92		0.92			0.74		0.74
	0.93		0.98			0.77		0.88
	0.92					0.64

## Sheet: Figure 5
Figure 5a
Months	Sham										AR
0.5	-26.33	-16.44	-20.88	-26.46	-26.59	-29.91	-34.63				-29.34	-28.99	-29.23	-31.81	-30.71	-23.16	-20.44	-24.32	-23.42	-24.58
2	-28.8		-26.95	-27.33	-22.75	-28.15	-21.15				-29.39	-30.09	-23.21		-21.74	-16.77	-21.38	-26.72	-23.26	-22.47
4	-23.67	-18.67	-24.68	-23.66	-17.93		-25.54	-17.35			-21.91	-22.5	-12.27	-20.36	-23.32	-16.88	-20.71	-18.9	-19.34	-12.8
6	-18.92	-18.32	-24.8	-16.83	-18.88	-14.09	-15.83	-17.84			-18.05	-19.29	-16.12	-18.71	-11.92	-15.99	-9.87
Figure 5B
Months	Sham										AR
0.5	-27.12	-21.39	-25.45	-23.92	-28.26	-23.75	-30	-21.04			-29.86	-21.82	-28.77	-27.86	-27.28	-29.24	-28.32	-26.5	-27.31
2	-25.41	-25.44	-41.55	-25.77	-24.53	-20.68	-26.75	-22.17			-25.58	-25.37	-22.49	-20.01	-24.953	-25.032	-25.05	-20.578	-20.76
4	-12.46	-13.51	-16.99	-18.75	-18.31	-22.56					-26.41	-13.64	-27.73	-19.94	-21.52	-21.56	-17.37	-9.2	-15.9
6	-17.66	-27.62		-19.69	-26.37	-19.68	-17.14				-16.99	-14.2	-15.84	-19.42	-21.26	-19.11	-16.79	-12.81
Figure 5C
Months	Sham										AR
0.5	-32.39	-38.25	-29.53	-30.72	-32.35						-35.7	-44.45	-33.47	-34.71		-30.61	-34.34	-35.2	-30.83	-42.48
2			-38.21	-31.71	-35.21	-32.92	-30.94	-29.65			-27.72	-38.41	-32.3	-31.74	-26.58	-23.8	-39.92	-26.72	-20.43	-21.7
4	-30.8	-28.83	-37.88			-29.21	-32.72	-26.21			-27.61	-36.46	-28.68	-25.52	-24.27	-24.52	-37.87	-22.45	-23.22	-25.72
6	-33.58		-35.91	-23.28	-24	-27.37	-33.97				-26.35	-36	-24.36	-25.21	-17.6	-27.28	-22.69
Figure 5D
Months	Sham										AR
0.5	-39.8		-46.94	-31.47	-32.45	-39.18	-35.06	-42.8			-32.74	-30.54	-33.48	-31.58	-36.87	-40.63	-31.24	-29.56	-36.23
2	-50.37		-44.06	-42.07	-34.11	-32.96	-40.27	-37.01			-26.94	-28.24	-30.53	-26.86	-33.006	-36.135	-30.025	-29.731	-24.508
4			-37.88			-37.12	-41.79	-39.45			-29.35	-19.29	-30.57	-29.51	-28.43	-31.88	-25.54	-18.67	-24.15
6	-31.67	-29.02	-28.38	-34.01	-29.7	-35.22	-32.1				-21.59	-18.1		-24.19	-31.03	-32.9	-32.38	-23.62	-18.93
